# Supplementary material
Source: PubMed Central journal article supplement (PMC5975237)
Supplement: NIHMS968202-supplement-1.pdf [file NIHMS968202-supplement-1.pdf]

# Supporting Information

for

## Identification of cyclic depsipeptides and the dedicated synthetase from *Hapsidospora irregularis*

Shuwei Zhang,<sup>†</sup> Yixing Qiu,<sup>†,‡</sup> Thomas B. Kakule,<sup>§</sup> Zhenyu Lu,<sup>⊥</sup> Fuchao Xu,<sup>†</sup> John G. Lamb,<sup>⊥</sup>  
Christopher A. Reilly,<sup>⊥</sup> Yong Zheng,<sup>||</sup> Shing Wo Simon Sham,<sup>∇</sup> Wei Wang,<sup>‡\*</sup> Lijiang Xuan,<sup>||</sup>  
Eric W. Schmidt<sup>§</sup> and Jixun Zhan<sup>†,‡\*</sup>

<sup>†</sup> Department of Biological Engineering, Utah State University, 4105 Old Main Hill, Logan, UT 84322, USA

<sup>‡</sup> TCM and Ethnomedicine Innovation & Development Laboratory, School of Pharmacy, Hunan University of Chinese Medicine, Changsha, Hunan 410208, China

<sup>§</sup> Department of Medicinal Chemistry, L. S. Skaggs Pharmacy Institute, University of Utah, Salt Lake City, UT 84112, USA

<sup>⊥</sup> Department of Pharmacology and Toxicology, University of Utah, Salt Lake City, UT 84112, USA

<sup>||</sup> State Key Laboratory of Drug Research, Shanghai Institute of Materia Medica, Chinese Academy of Sciences, 501 Haik Road, Shanghai 202203, China

<sup>∇</sup> Department of Chemistry and Biochemistry, Utah State University, 0300 Old Main Hill, Logan, UT 84322, USA

E-mail: jixun.zhan@usu.edu; wangwei402@hotmail.com

**Table S1.** Determination of the absolute configuration of amino and hydroxyl acid moieties in **1-7**.

**Table S2.** Ca<sup>2+</sup> flux data for **1-7** in primary human lobar bronchial epithelial cells, HEK-293 TRP channel overexpressing cells, and BEAS-2B (immortalized human bronchial epithelial) cells.

**Table S3.** The extracted signature sequences of the A domains of LACS.

**Figure S1.** HPLC analysis of the metabolites of *Hapsidospora irregularis* FERM BP-2511 in K2 broth (bottom) and K2 broth supplemented with 0.5% L-tyrosine (top) at 210 nm.

**Figure S2.** <sup>1</sup>H NMR spectrum of **1** in CDCl<sub>3</sub>.

**Figure S3.** <sup>13</sup>C NMR spectrum of compound **1** in CDCl<sub>3</sub>.

**Figure S4.** <sup>1</sup>H NMR spectrum of **2** in CDCl<sub>3</sub>.

**Figure S5.** <sup>13</sup>C NMR spectrum of **2** in CDCl<sub>3</sub>.

**Figure S6.** <sup>1</sup>H-<sup>1</sup>H COSY NMR spectrum of **2** in CDCl<sub>3</sub>.

**Figure S7.** HSQC NMR spectrum of **2** in CDCl<sub>3</sub>.

**Figure S8.** HMBC NMR spectrum of **2** in CDCl<sub>3</sub>.

**Figure S9.** <sup>1</sup>H NMR spectrum of **3** in CDCl<sub>3</sub>.

**Figure S10.** <sup>13</sup>C NMR spectrum of **3** in CDCl<sub>3</sub>.

**Figure S11.** <sup>1</sup>H-<sup>1</sup>H COSY NMR spectrum of **3** in CDCl<sub>3</sub>.

**Figure S12.** HSQC NMR spectrum of **3** in CDCl<sub>3</sub>.

**Figure S13.** HMBC NMR spectrum of **3** in CDCl<sub>3</sub>.

**Figure S14.** <sup>1</sup>H NMR spectrum of **4** in CDCl<sub>3</sub>.

**Figure S15.** <sup>13</sup>C NMR spectrum of **4** in CDCl<sub>3</sub>.

**Figure S16.** <sup>1</sup>H-<sup>1</sup>H COSY NMR spectrum of **4** in CDCl<sub>3</sub>.

**Figure S17.** HSQC NMR spectrum of **4** in CDCl<sub>3</sub>.

**Figure S18.** HMBC NMR spectrum of **4** in CDCl<sub>3</sub>.

**Figure S19.** <sup>1</sup>H NMR spectrum of **5** in CDCl<sub>3</sub>.

**Figure S21.** <sup>13</sup>C NMR spectrum of **5** in CDCl<sub>3</sub>.

**Figure S21.** <sup>1</sup>H-<sup>1</sup>H COSY NMR spectrum of **5** in CDCl<sub>3</sub>.

**Figure S22.** HSQC NMR spectrum of **5** in CDCl<sub>3</sub>.

**Figure S23.** HMBC NMR spectrum of **5** in CDCl<sub>3</sub>.

**Figure S24.** <sup>1</sup>H NMR spectrum of **6** in CDCl<sub>3</sub>.

**Figure S25.** <sup>13</sup>C NMR spectrum of **6** in CDCl<sub>3</sub>.

**Figure S26.** <sup>1</sup>H-<sup>1</sup>H COSY NMR spectrum of **6** in CDCl<sub>3</sub>.

**Figure S27.** HSQC NMR spectrum of **6** in CDCl<sub>3</sub>.

**Figure S28.** HMBC NMR spectrum of **6** in CDCl<sub>3</sub>.

**Figure S29.** <sup>1</sup>H NMR spectrum of **7** in CD<sub>3</sub>OD.

**Figure S30.** <sup>13</sup>C NMR spectrum of **7** in CD<sub>3</sub>OD.

**Figure S31.** <sup>1</sup>H-<sup>1</sup>H COSY NMR spectrum of **7** in CD<sub>3</sub>OD.

**Figure S32.** HSQC NMR spectrum of **7** in CD<sub>3</sub>OD.

**Figure S33.** HMBC NMR spectrum of **7** in CD<sub>3</sub>OD.

**Figure S34.** Hydrolysis and purification procedure of compounds **2**, **4**, and **6**.

**Table S1.** Determination of the absolute configuration of amino and hydroxyl acid moieties in **1-7** (recorded on a Rudolph Autopol IV polarimeter using a 10-cm microcell at 19 °C).

| Compound                                                                                                                                                              | Fragment after hydrolysis  | Conc. (g/100 mL) | Solvent  | $[\alpha]_D^{19}$ |
|-----------------------------------------------------------------------------------------------------------------------------------------------------------------------|----------------------------|------------------|----------|-------------------|
| <b>1</b>                                                                                                                                                              |                            | 1.00             | Methanol | -97.8             |
| <b>2</b>                                                                                                                                                              |                            | 0.30             | Methanol | -99.0             |
|                                                                                                                                                                       | <i>N</i> -Me-L-Phe from 2A | 0.095            | 6 N HCl  | +21.1             |
|                                                                                                                                                                       | 3-AIB from 2A              | 0.10             | 6 N HCl  | -16.0             |
|                                                                                                                                                                       | L-Leu from 2B              | 0.15             | 6 N HCl  | +15.7             |
| <b>3</b>                                                                                                                                                              |                            | 1.17             | Methanol | -48.2             |
| <b>4</b>                                                                                                                                                              |                            | 0.25             | Methanol | -68.0             |
|                                                                                                                                                                       | <i>R</i> -HICA from 4B     | 0.06             | 1 N NaOH | +21.7             |
|                                                                                                                                                                       | L-Val from 4B              | 0.09             | 6 N HCl  | +27.8             |
| <b>5</b>                                                                                                                                                              |                            | 0.62             | Methanol | -96.1             |
| <b>6</b>                                                                                                                                                              |                            | 0.50             | Methanol | -46.0             |
|                                                                                                                                                                       | <i>S</i> -HICA from 6A     | 0.23             | 1 N NaOH | -23.5             |
|                                                                                                                                                                       | <i>R</i> -HICA from 6B     | 0.17             | 1 N NaOH | +21.8             |
|                                                                                                                                                                       | L-Leu from 6B              | 0.19             | 6 N HCl  | +16.9             |
|                                                                                                                                                                       | L-Tyr from 6A              | 0.22             | 6 N HCl  | -9.5              |
| <b>7</b>                                                                                                                                                              |                            | 0.34             | Methanol | -52.9             |
| HICA = 2-hydroxy isocaproic acid; 3-AIB = 3-aminoisobutyric acid; Val = valine; Leu = leucine; Tyr = tyrosine; <i>N</i> -Me-L-Phe = <i>N</i> -methyl-L-phenylalanine. |                            |                  |          |                   |

**Table S2.** Ca<sup>2+</sup> flux data for **1-7** in primary human lobar bronchial epithelial cells, HEK-293 TRP channel overexpressing cells, and BEAS-2B (immortalized human bronchial epithelial) cells.

| Compound | Cell Identity (Ca <sup>2+</sup> Response as % positive control) |                             |                     |               |               |         |               |         |
|----------|-----------------------------------------------------------------|-----------------------------|---------------------|---------------|---------------|---------|---------------|---------|
|          | LOBAR                                                           | HEK-293 TRPA1               | HEK-293 TRPM8       | HEK-293 TRPV3 | HEK-293 TRPV4 | HEK-293 | BEAS-2B TRPV1 | BEAS-2B |
| <b>1</b> | 2 ± 1                                                           | 4 ± 6                       | 19 ± 5              | 10 ± 3        | 1 ± 1         | 10 ± 2  | 20 ± 20       | 21 ± 7  |
| <b>2</b> | N.D.                                                            | N.D.                        | 1 ± 2               | 4.40 ± 0.06   | 1 ± 1         | 3 ± 3   | 1 ± 1         | 10 ± 2  |
| <b>3</b> | 0.6 ± 0.4                                                       | <b>41 ± 9</b><br>(p=0.008)  | 7 ± 2               | 6 ± 3         | 5 ± 2         | 13 ± 4  | 1 ± 1         | N.D.    |
| <b>4</b> | N.D.                                                            | 20 ± 10                     | 3 ± 5               | 2 ± 2         | 2 ± 1         | 2 ± 3   | N.D.          | N.D.    |
| <b>5</b> | 4 ± 3                                                           | 3 ± 7                       | 14 ± 9              | 8 ± 2         | 2.6 ± 0.6     | N.D.    | 3 ± 1         | 8 ± 2   |
| <b>6</b> | <b>37 ± 3</b><br>(p=0.001)                                      | <b>88 ± 6</b><br>(p=0.0001) | 21 ± 6<br>(p=0.058) | 13 ± 3        | 1.5 ± 0.4     | 10 ± 4  | 8 ± 10        | 16 ± 6  |
| <b>7</b> | N.D.                                                            | 1 ± 2                       | 10 ± 6              | 5 ± 2         | 3.9 ± 0.6     | N.D.    | 1 ± 2         | N.D.    |

Student's t-test, two-tailed p-value in parenthesis (n=3). Lobar cell response values were compared to the buffer only control. HEK-293 TRP-overexpressing cell response values were compared to the HEK-293 control value for the given compound. BEAS-2B TRPV1 cell responses were compared to the normal BEAS-2B response.

**Table S3.** The extracted signature sequences of the A domains of LACS.

| A domain of LACS | Signature sequence | Substrate             |
|------------------|--------------------|-----------------------|
| A <sub>1</sub>   | DIYYVSATAK         | $\beta$ -Alanine      |
| A <sub>2</sub>   | GANLIGATVK         | <i>S</i> -Leucic acid |
| A <sub>3</sub>   | DAHDIGAPIK         | L-Leucine             |
| A <sub>4</sub>   | DGLFIGIPVK         | <i>S</i> -Leucic acid |
| A <sub>5</sub>   | DPWTYGAVVK         | L-Phenylalanine       |

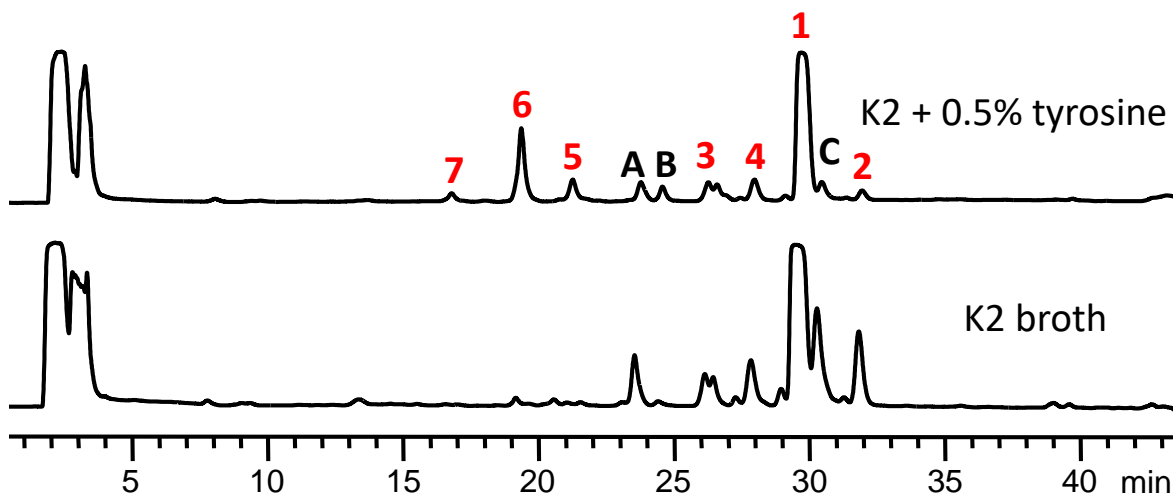

**Figure S1.** HPLC analysis of the metabolites of *Hapsidospora irregularis* FERM BP-2511 in K2 broth (bottom) and K2 broth supplemented with 0.5% L-tyrosine (top) at 210 nm. 1-7: compounds **1-7**, A: cephalosporin P1, B: isocephalosporin P1, C: mixture of the tetramic acids Sch210971 and Sch210972. HPLC condition: Agilent 1200 HPLC instrument with an Agilent XDB-C18 column (5  $\mu$ m, 4.6 mm  $\times$  250 mm), eluted with a gradient of acetonitrile-water (0-5 min: 5%, 5-40 min: 5–100%, 40-45 min: 100%) with 0.1% formic acid over 45 min at a flow rate of 1 mL min<sup>-1</sup>.

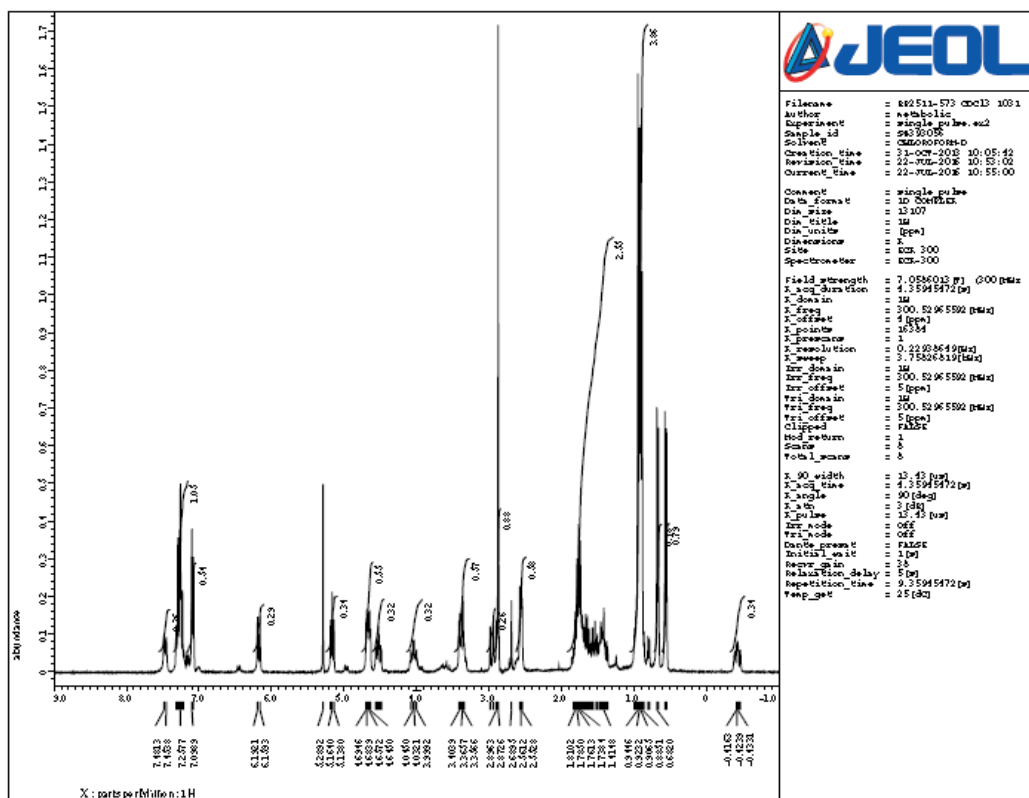

**Figure S2.** <sup>1</sup>H NMR spectrum of **1** in CDCl<sub>3</sub>.

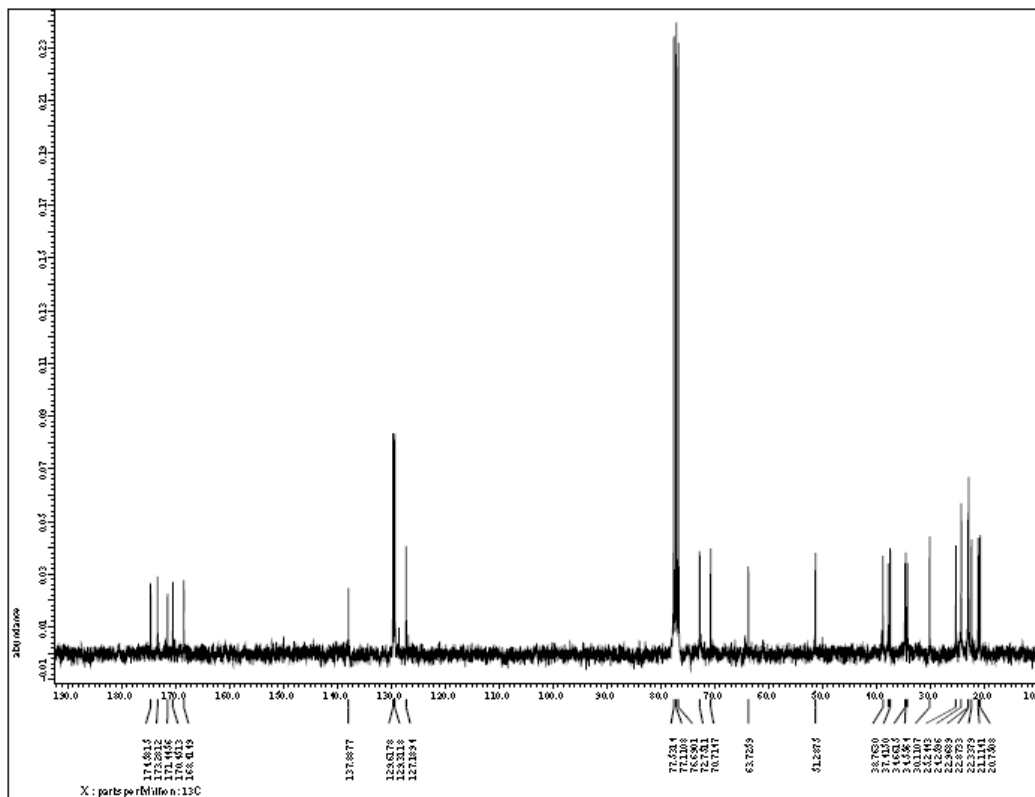

Figure S3.  $^{13}\text{C}$  NMR spectrum of compound 1 in  $\text{CDCl}_3$ .

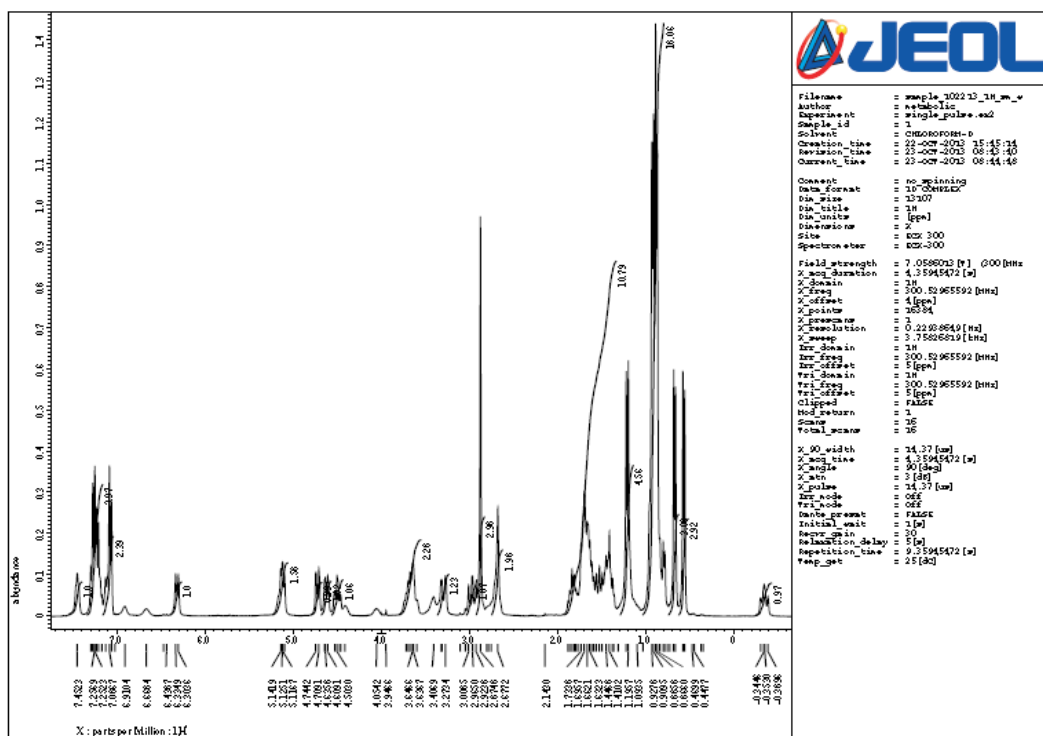

Figure S4.  $^1\text{H}$  NMR spectrum of 2 in  $\text{CDCl}_3$ .



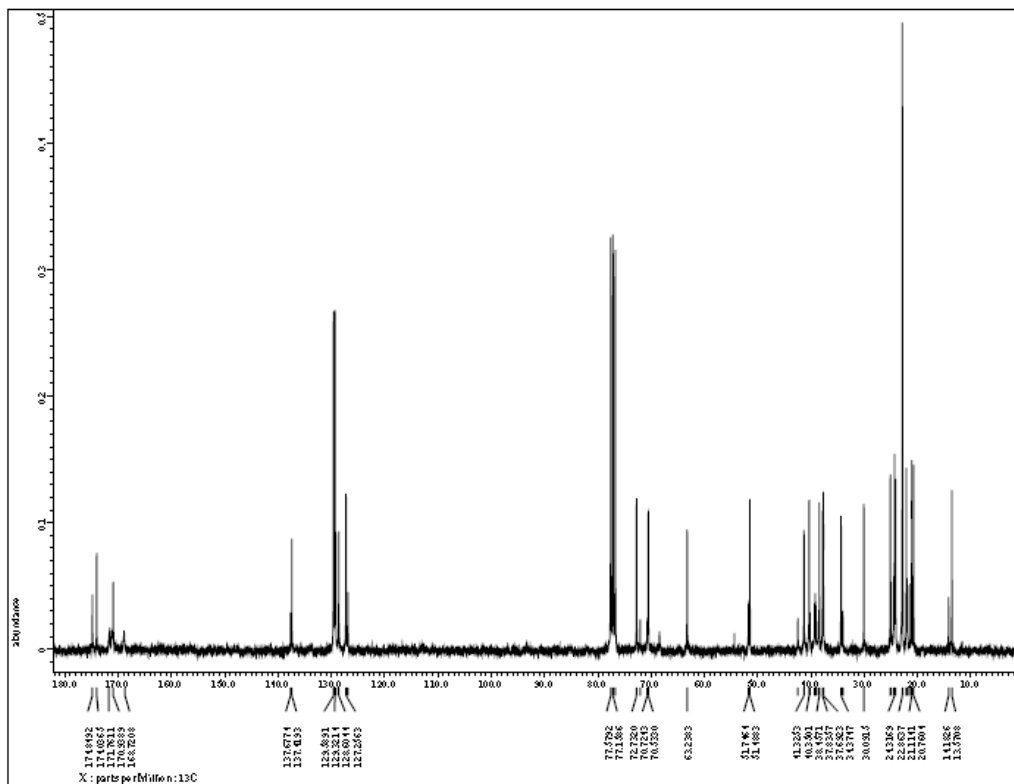

Figure S5. <sup>13</sup>C NMR spectrum of 2 in CDCl<sub>3</sub>.

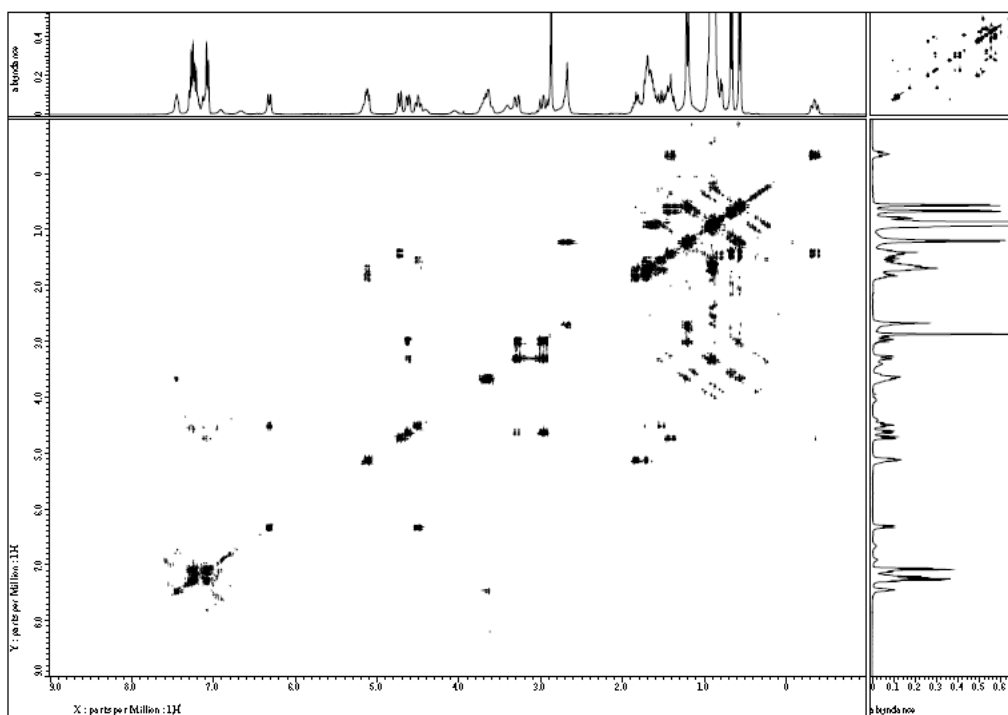

Figure S6. <sup>1</sup>H-<sup>1</sup>H COSY NMR spectrum of 2 in CDCl<sub>3</sub>.

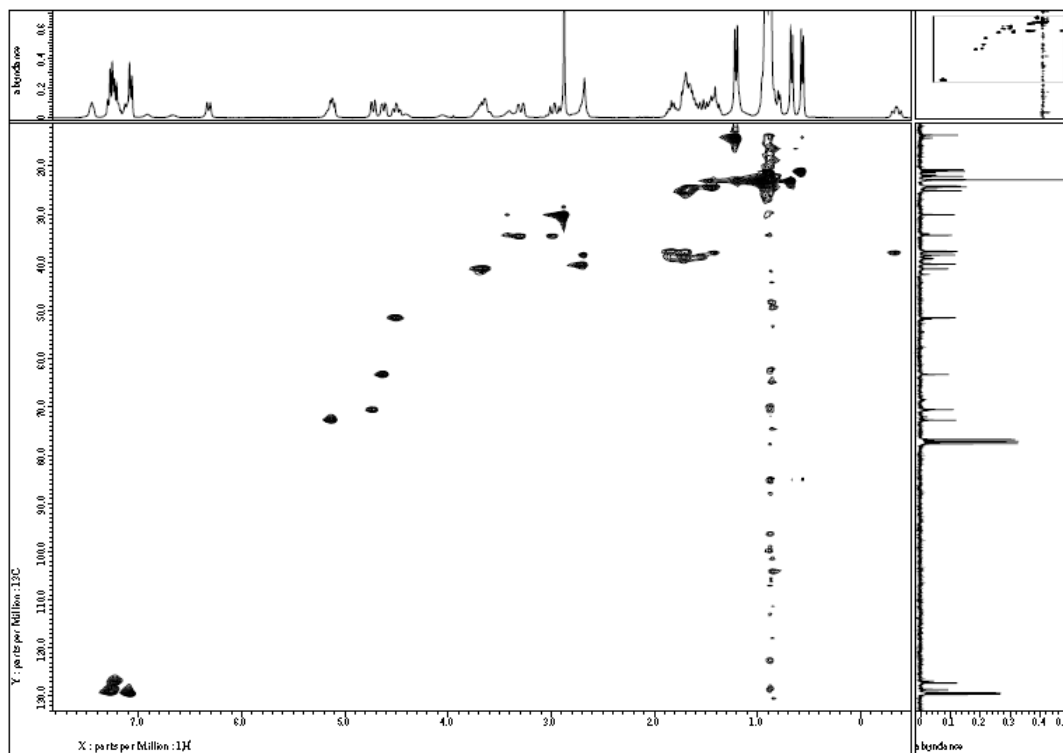

Figure S7. HSQC NMR spectrum of **2** in CDCl<sub>3</sub>.

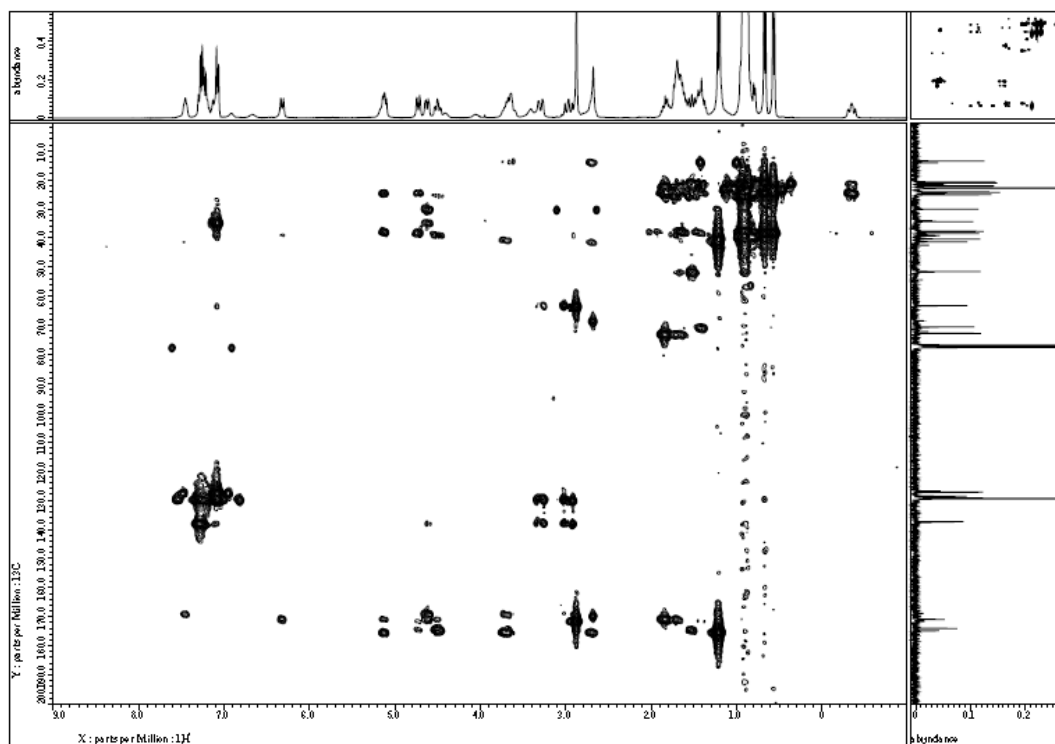

Figure S8. HMBC NMR spectrum of **2** in CDCl<sub>3</sub>.

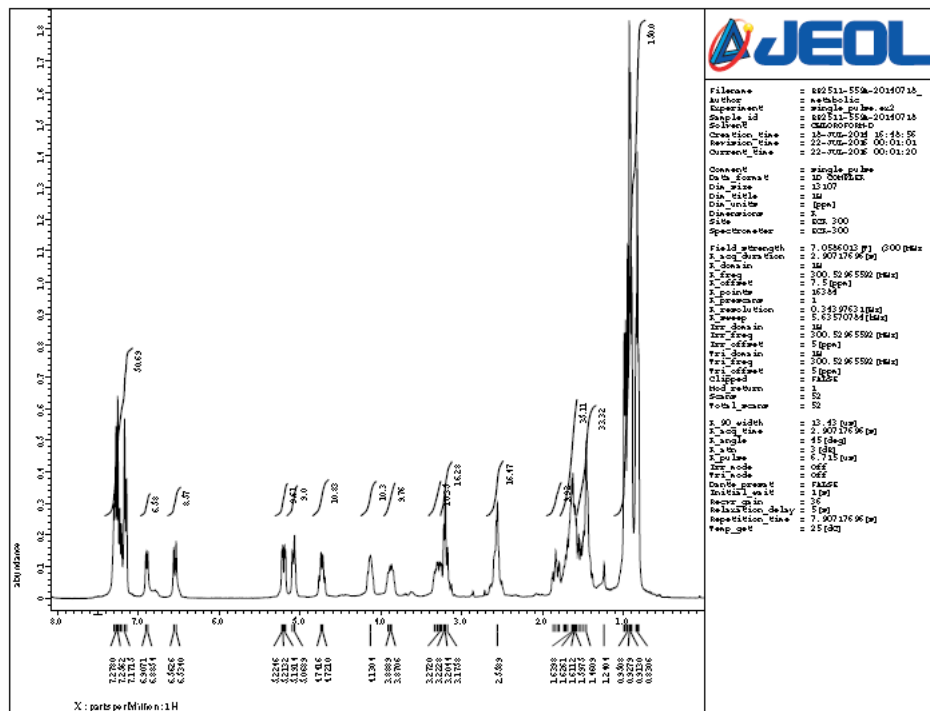

Figure S9.  $^1\text{H}$  NMR spectrum of **3** in  $\text{CDCl}_3$ .

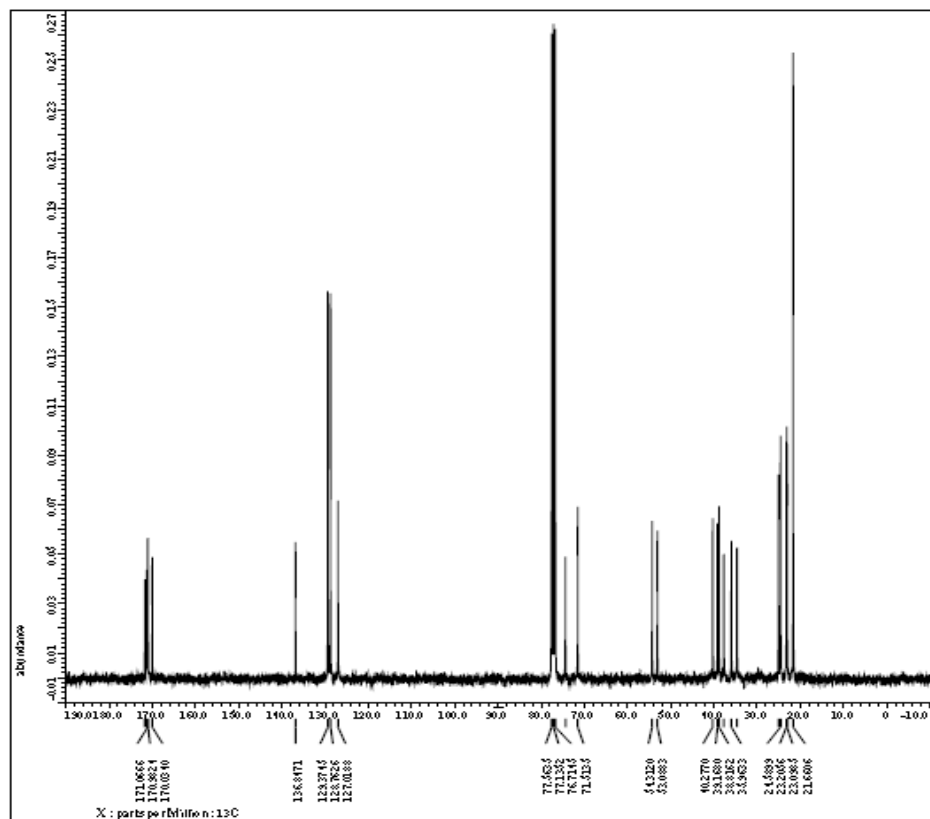

Figure S10.  $^{13}\text{C}$  NMR spectrum of **3** in  $\text{CDCl}_3$ .

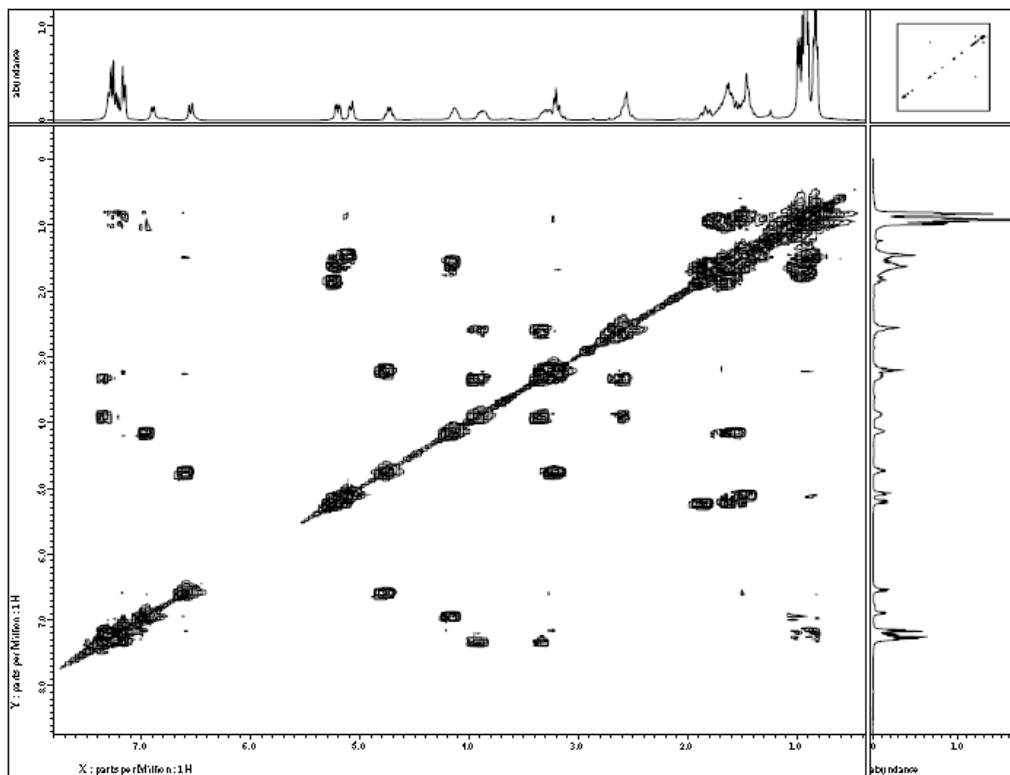

Figure S11.  $^1\text{H}$ - $^1\text{H}$  COSY NMR spectrum of **3** in  $\text{CDCl}_3$ .

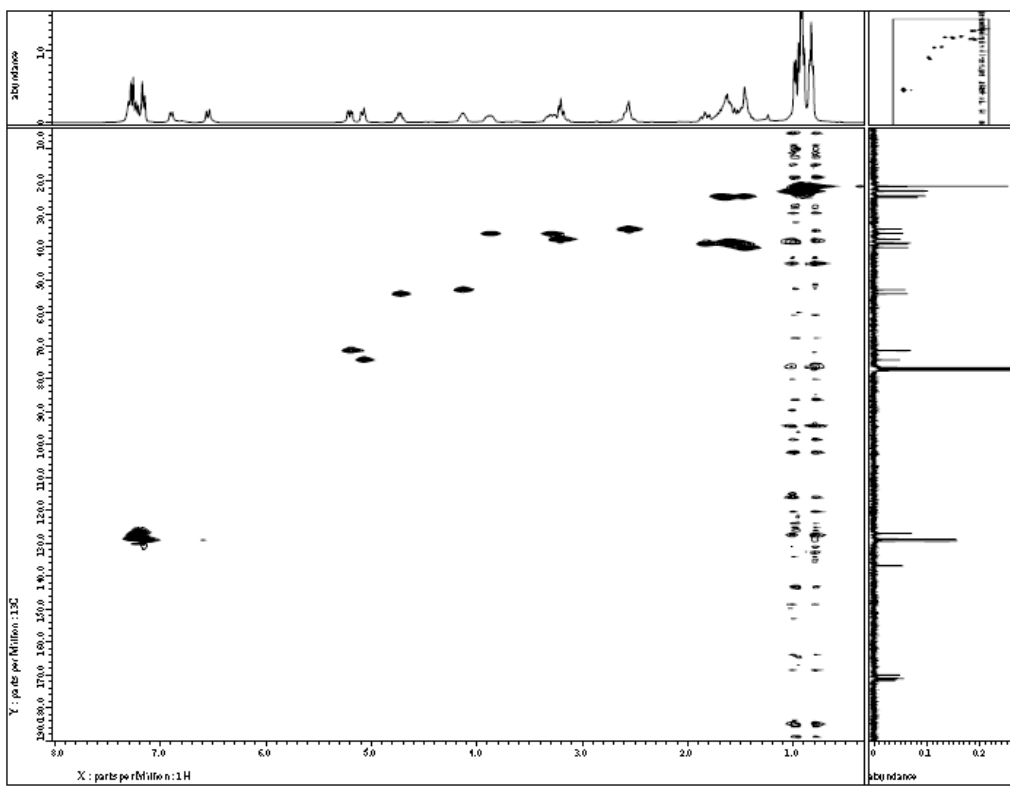

Figure S12. HSQC NMR spectrum of **3** in  $\text{CDCl}_3$ .

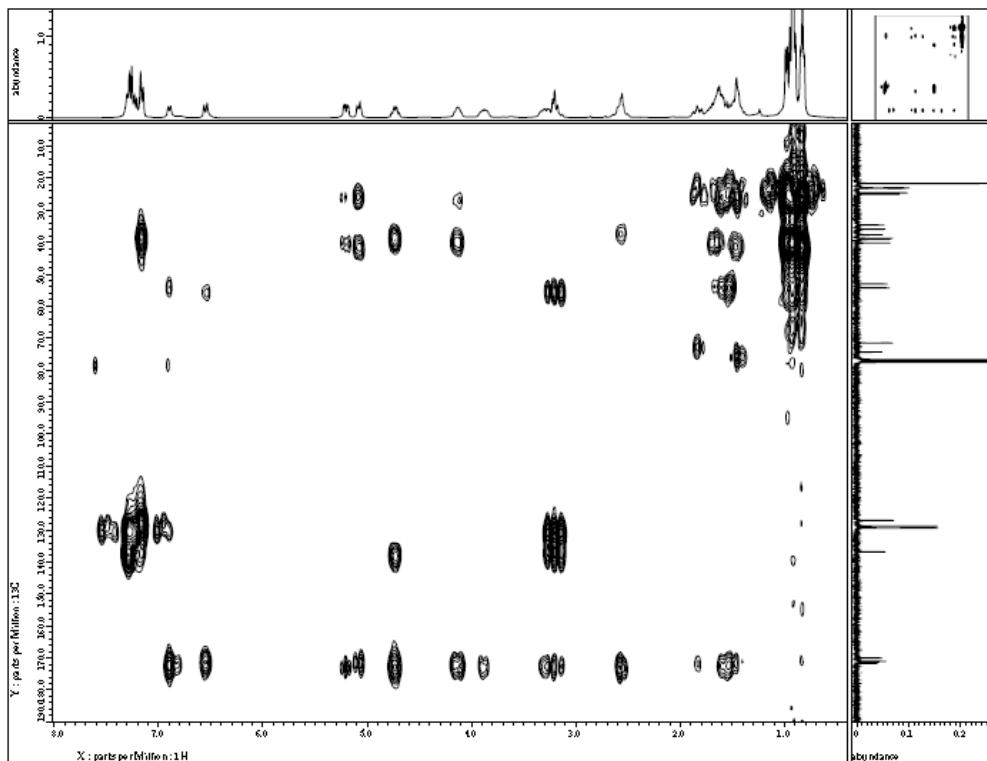

Figure S13. HMBC NMR spectrum of **3** in  $\text{CDCl}_3$ .

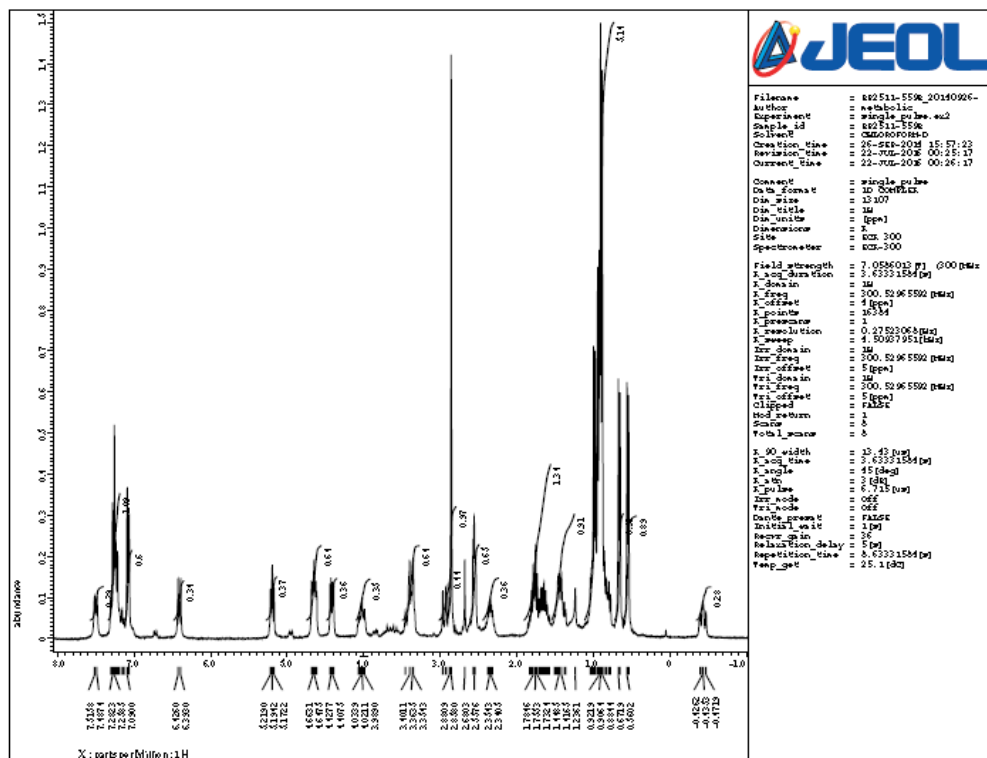

Figure S14.  $^1\text{H}$  NMR spectrum of **4** in  $\text{CDCl}_3$ .

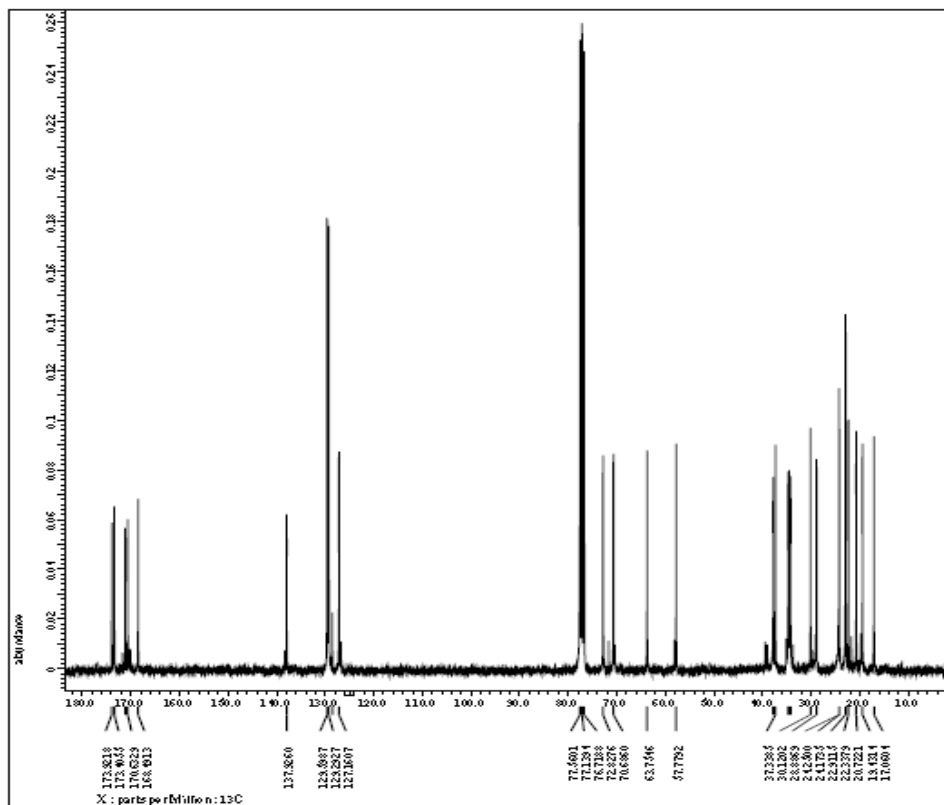

Figure S15.  $^{13}\text{C}$  NMR spectrum of **4** in  $\text{CDCl}_3$ .

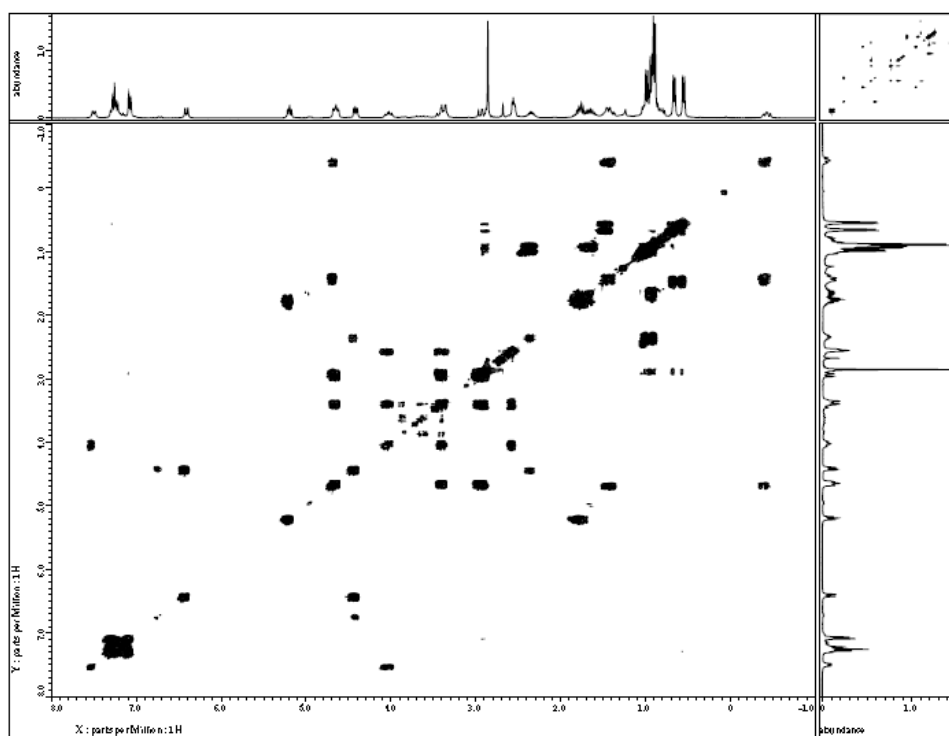

Figure S16.  $^1\text{H}$ - $^1\text{H}$  COSY NMR spectrum of **4** in  $\text{CDCl}_3$ .

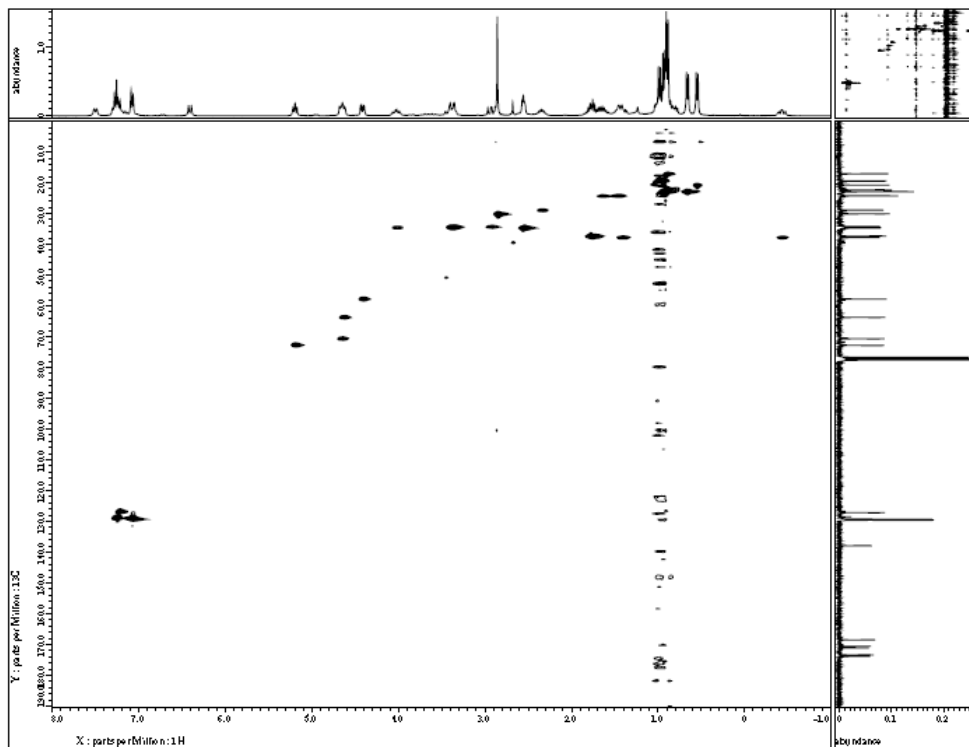

Figure S17. HSQC NMR spectrum of **4** in  $\text{CDCl}_3$ .

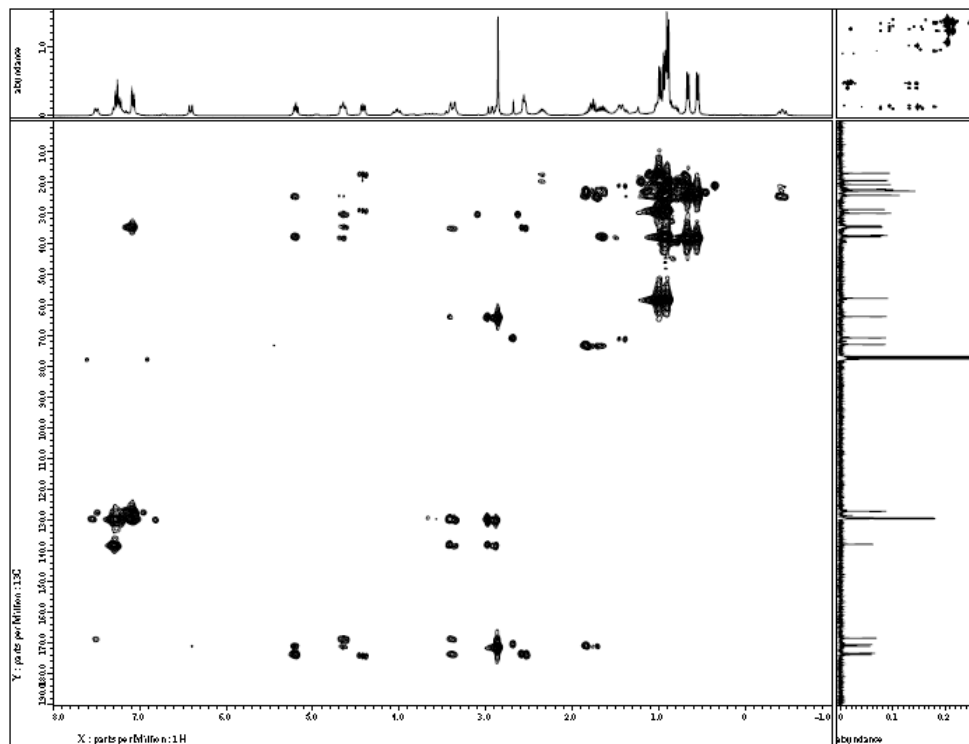

Figure S18. HMBC NMR spectrum of **4** in  $\text{CDCl}_3$ .





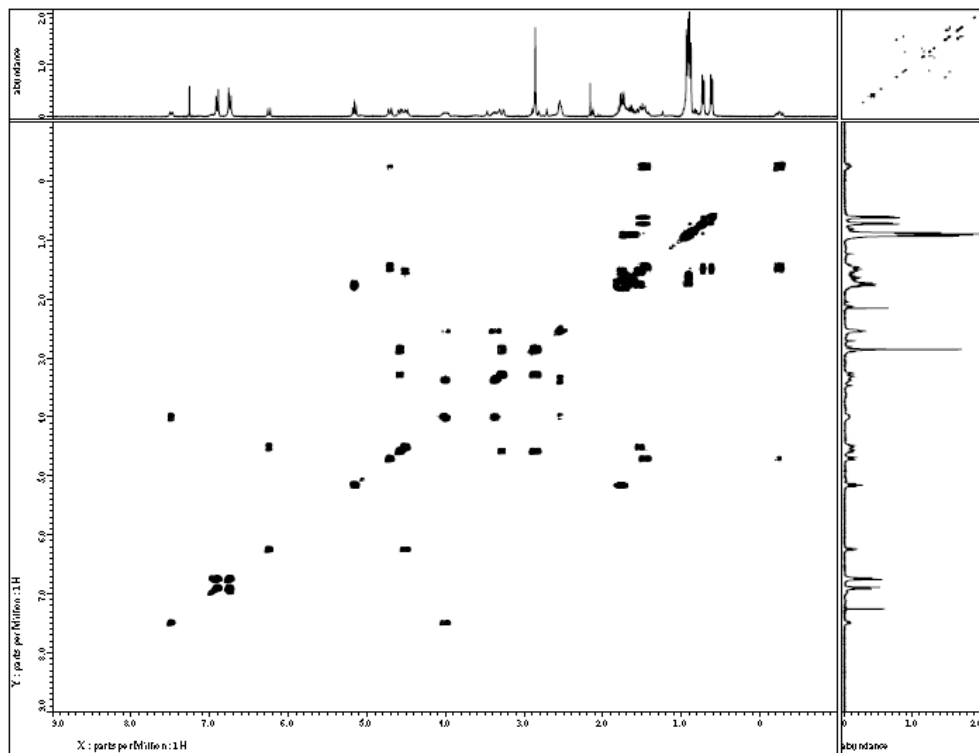

Figure S21.  $^1\text{H}$ - $^1\text{H}$  COSY NMR spectrum of **5** in  $\text{CDCl}_3$ .

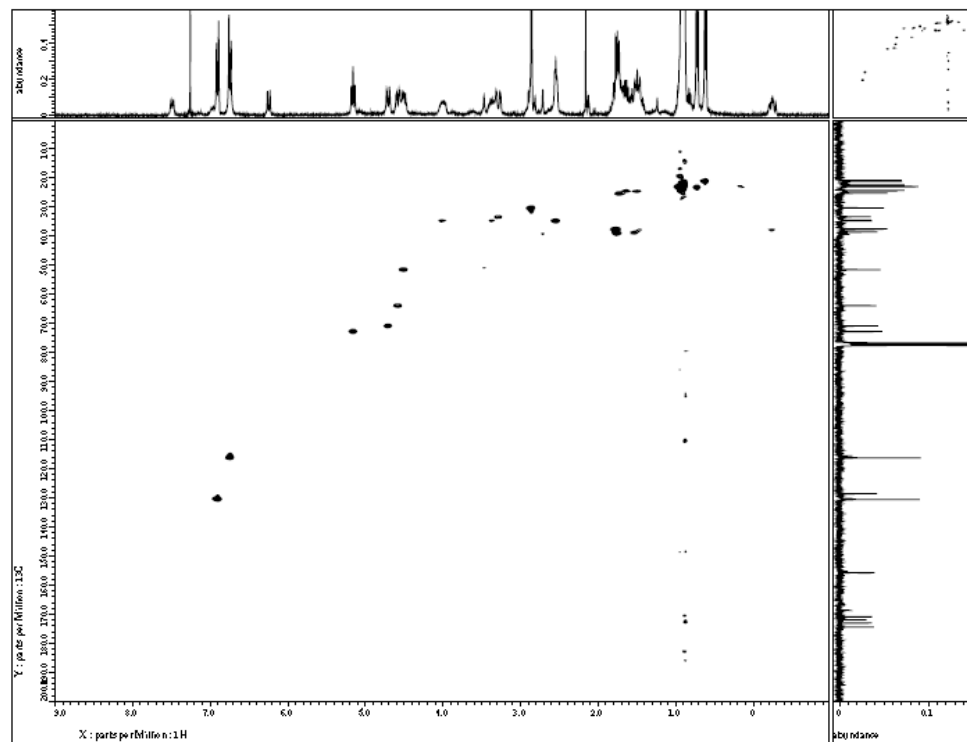

Figure S22. HSQC NMR spectrum of **5** in  $\text{CDCl}_3$ .

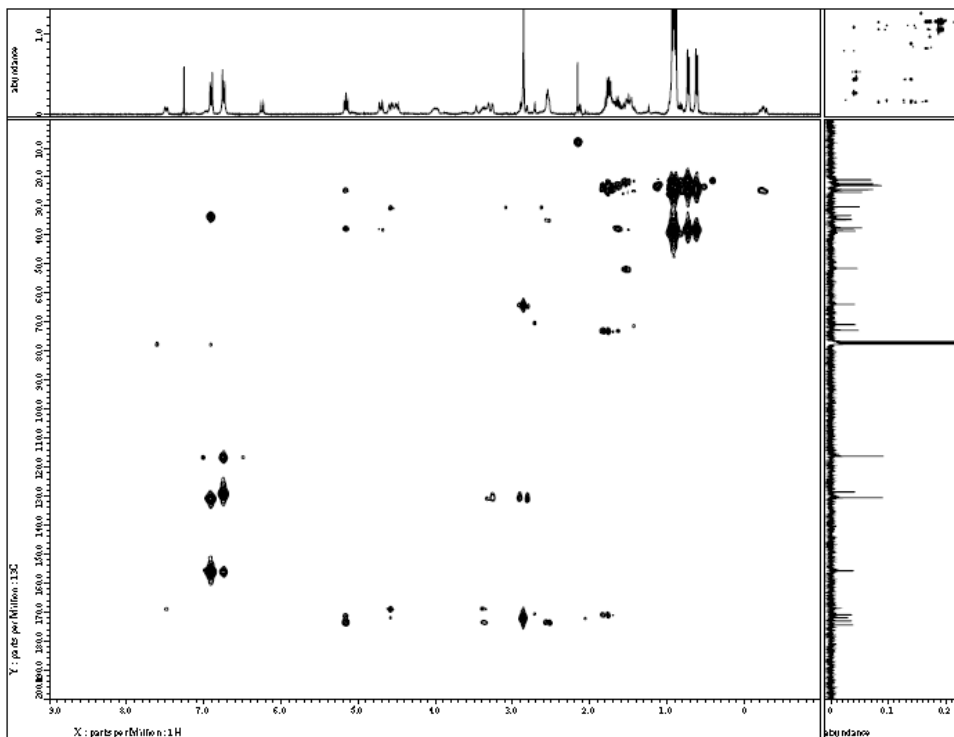

Figure S23. HMBC NMR spectrum of **5** in  $\text{CDCl}_3$ .

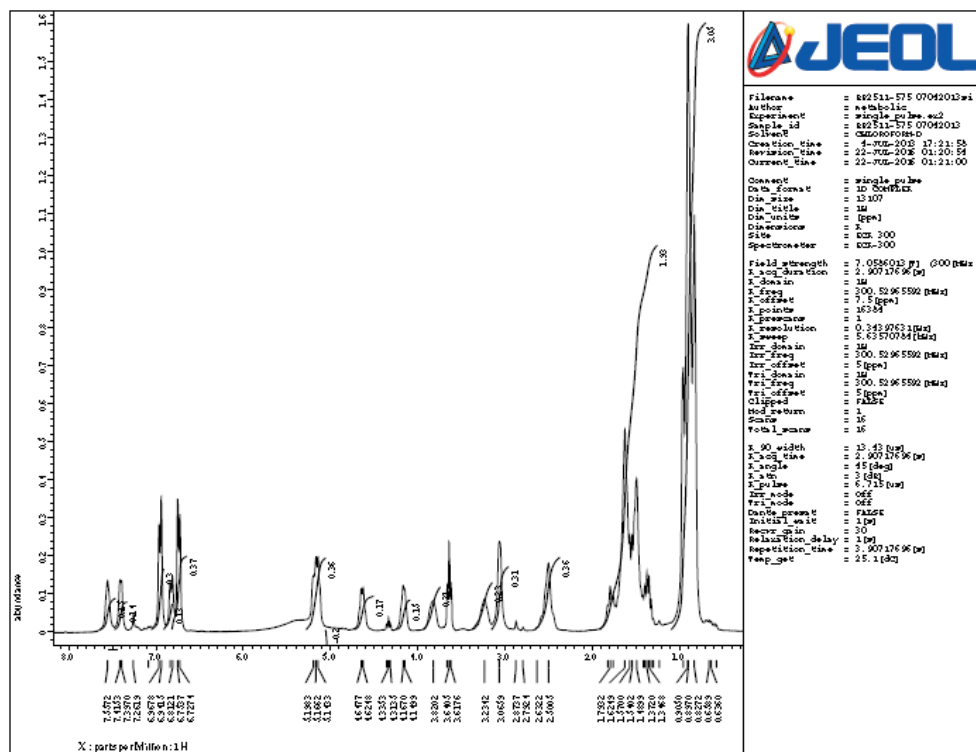

Figure S24.  $^1\text{H}$  NMR spectrum of **6** in  $\text{CDCl}_3$ .

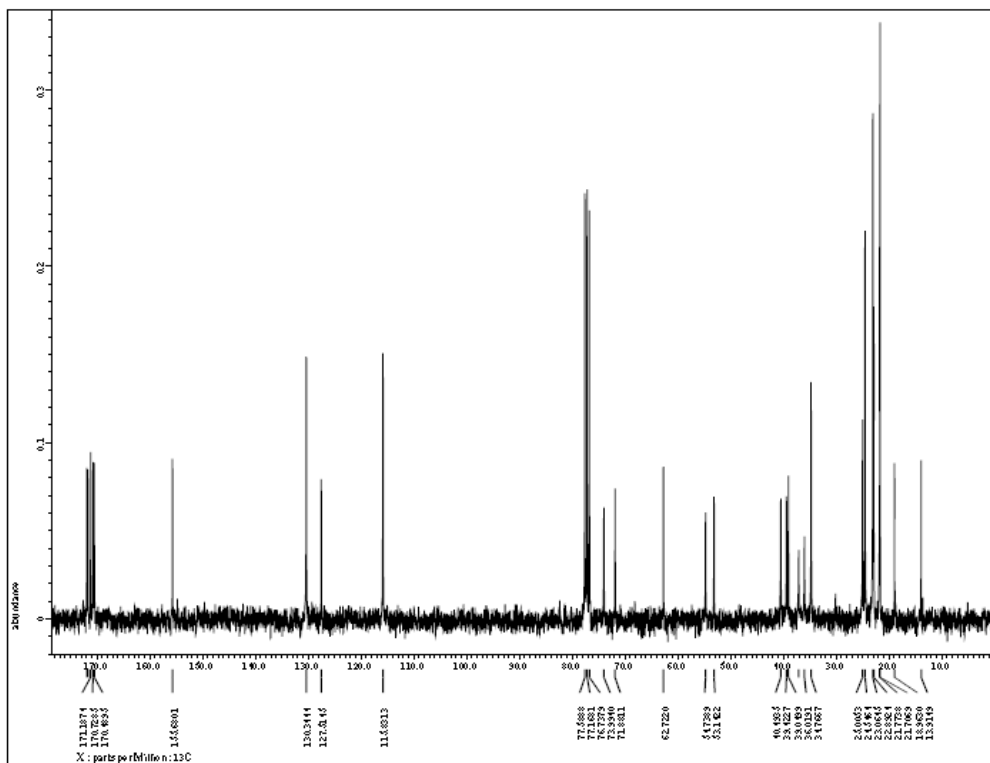

Figure S25.  $^{13}\text{C}$  NMR spectrum of **6** in  $\text{CDCl}_3$ .

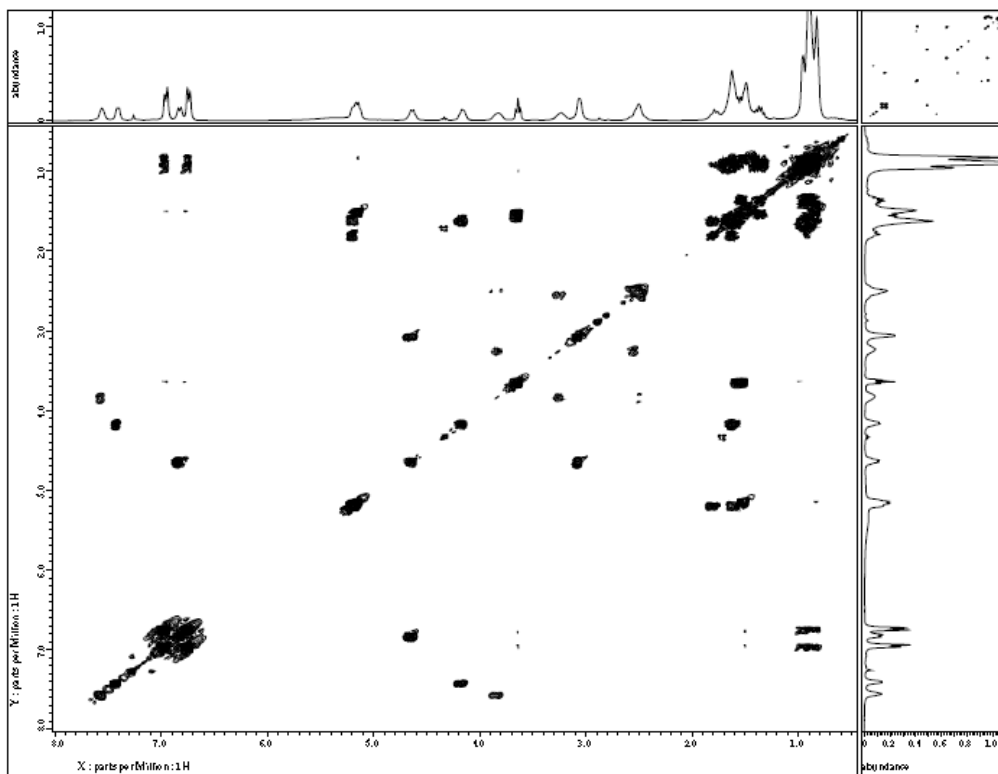

Figure S26.  $^1\text{H}$ - $^1\text{H}$  COSY NMR spectrum of **6** in  $\text{CDCl}_3$ .

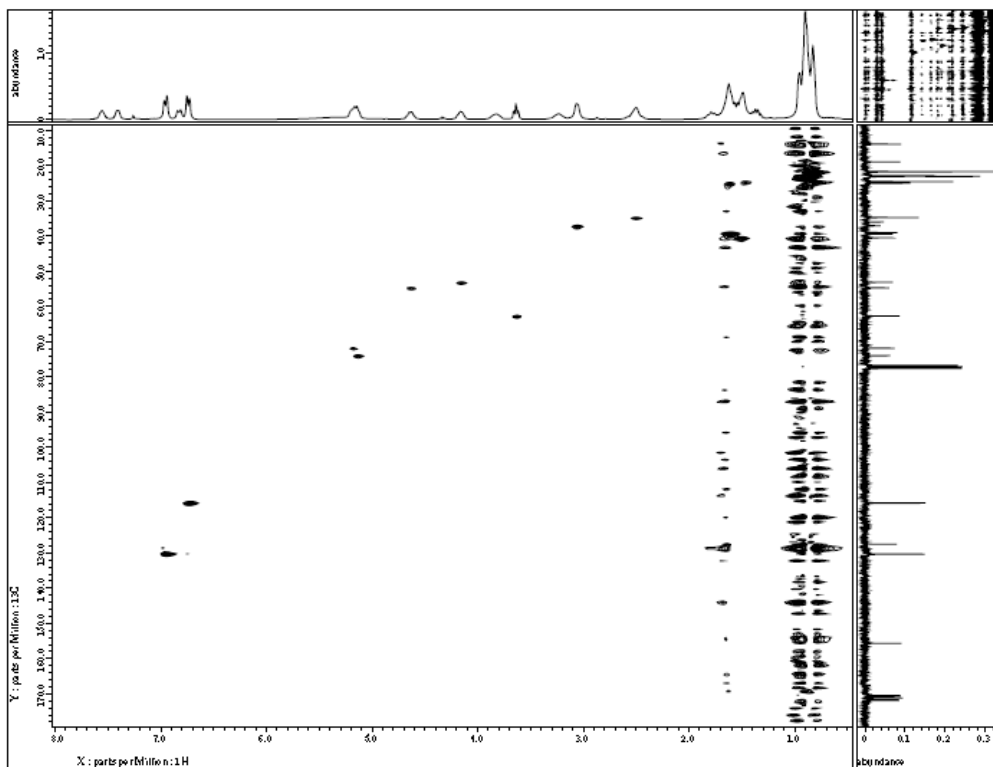

Figure S27. HSQC NMR spectrum of **6** in  $\text{CDCl}_3$ .

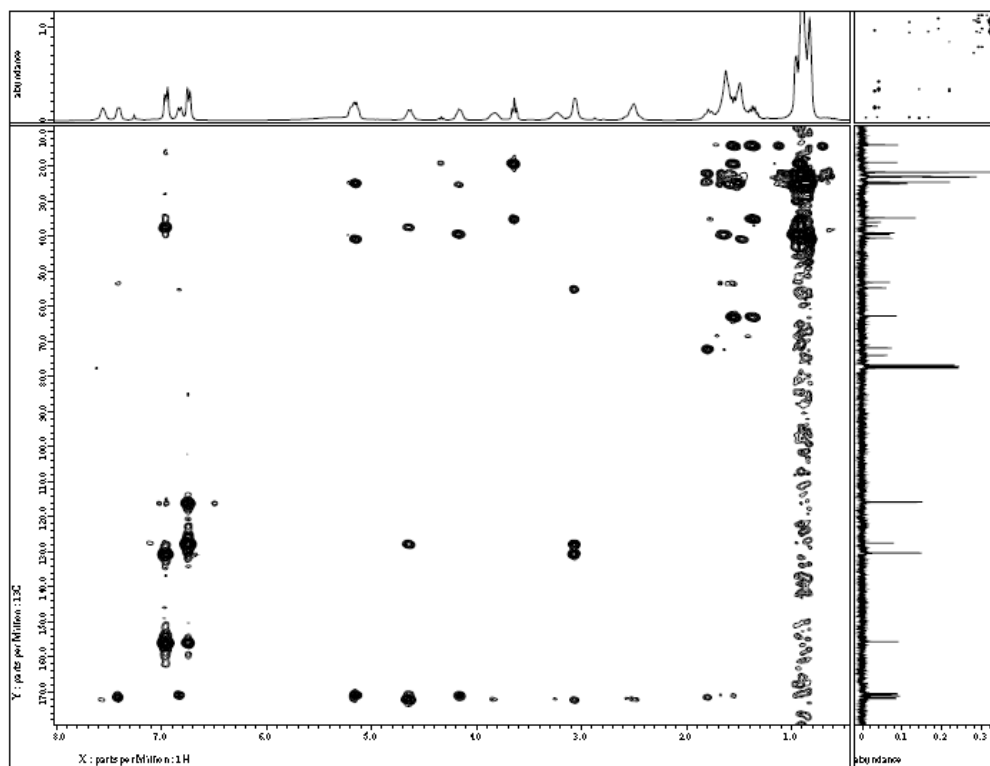

Figure S28. HMBC NMR spectrum of **6** in  $\text{CDCl}_3$ .

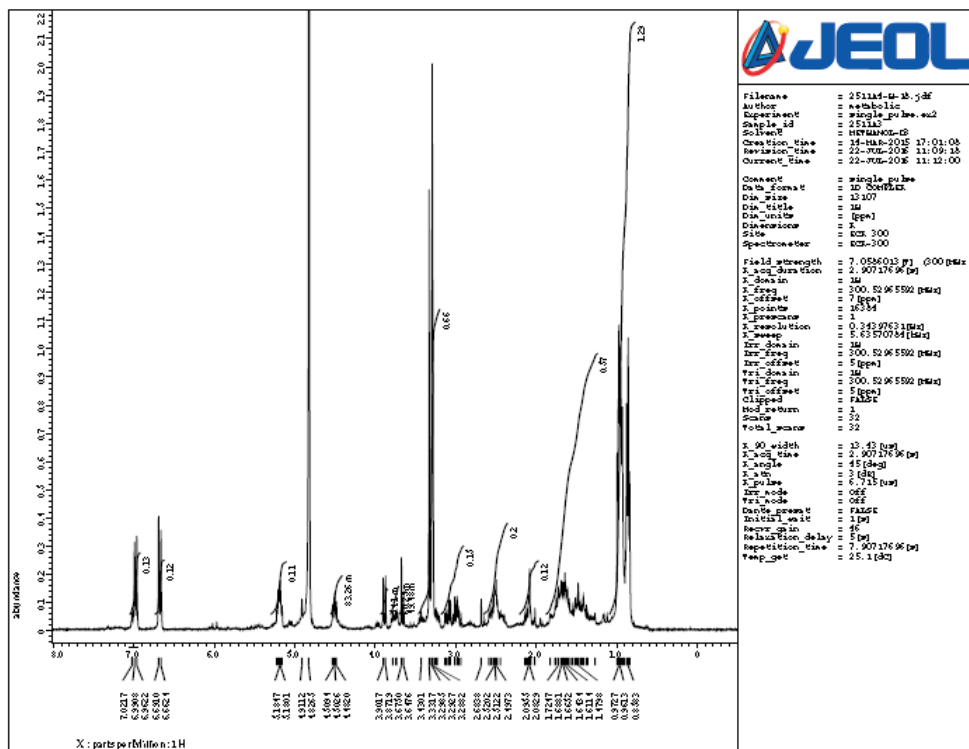

Figure S29. <sup>1</sup>H NMR spectrum of **7** in CD<sub>3</sub>OD.

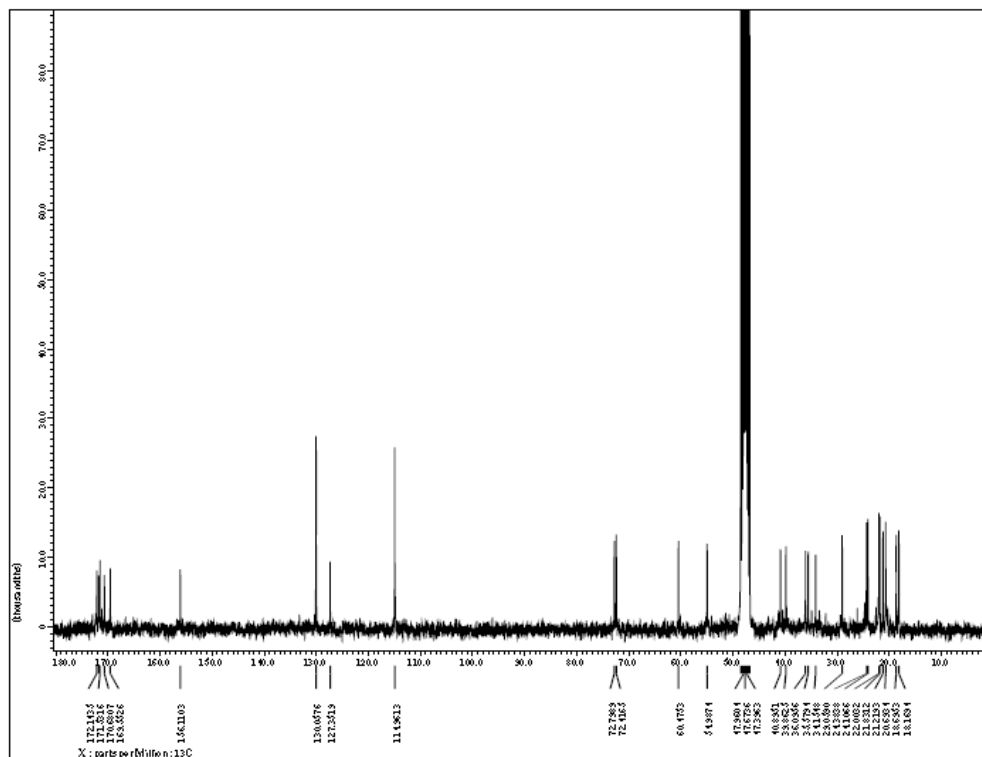

Figure S30. <sup>13</sup>C NMR spectrum of **7** in CD<sub>3</sub>OD.

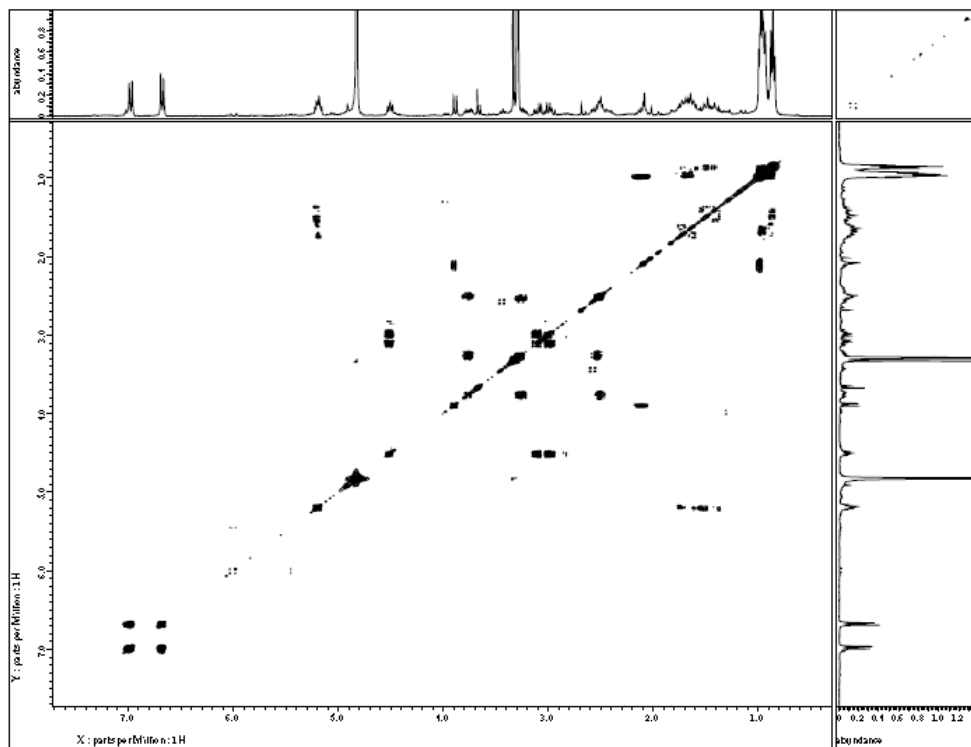

Figure S31.  $^1\text{H}$ - $^1\text{H}$  COSY NMR spectrum of **7** in  $\text{CD}_3\text{OD}$ .

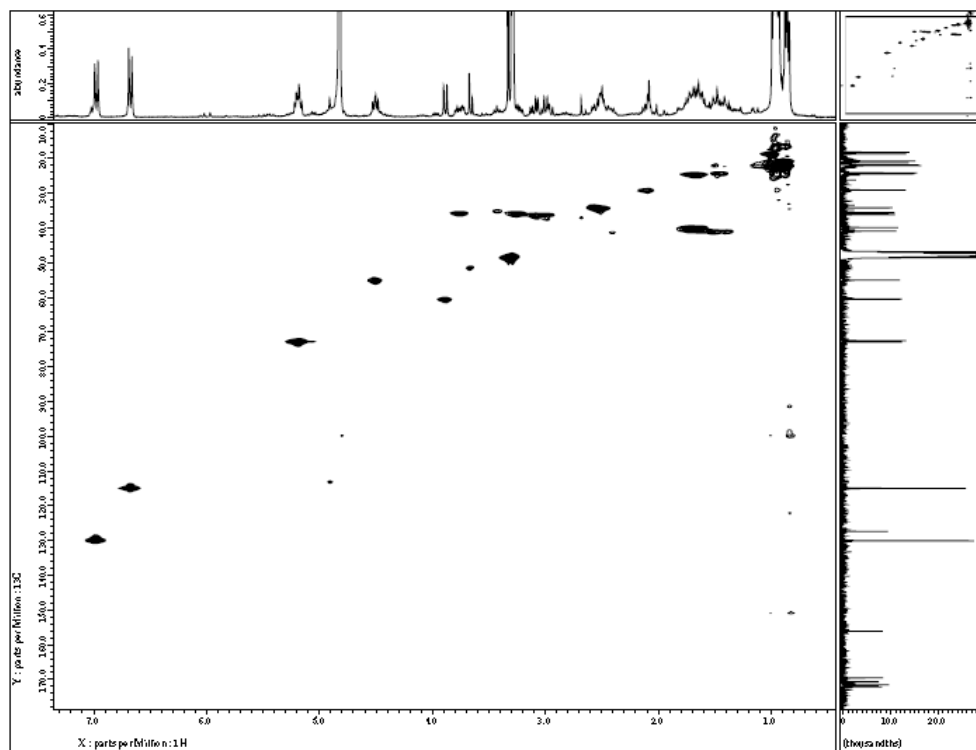

Figure S32. HSQC NMR spectrum of **7** in  $\text{CD}_3\text{OD}$ .

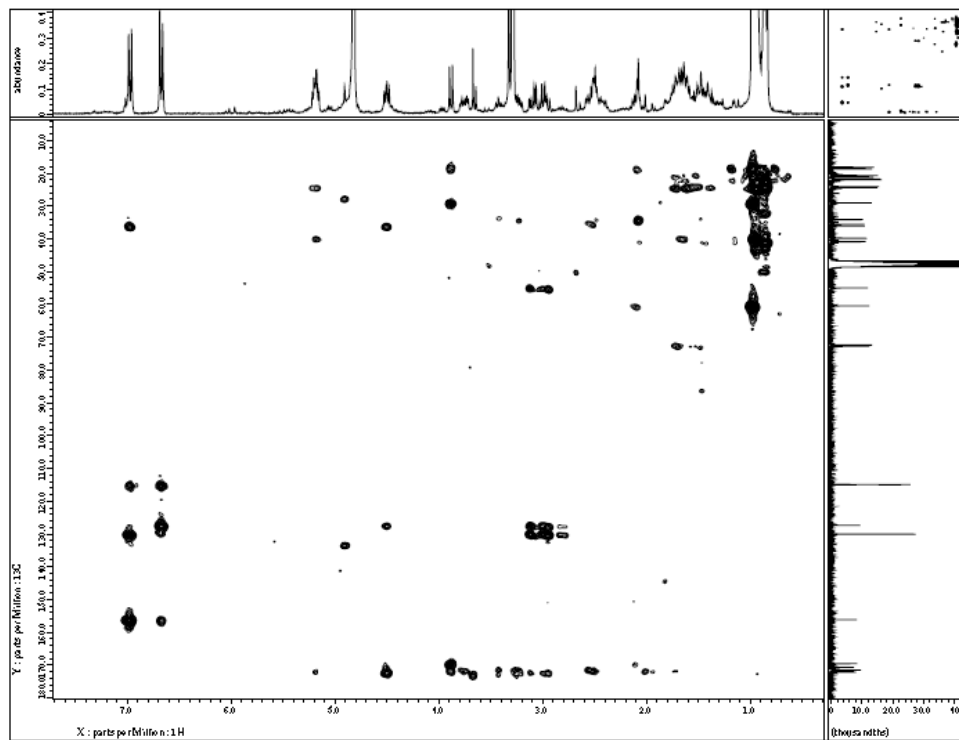

Figure S33. HMBC NMR spectrum of 7 in CD<sub>3</sub>OD.

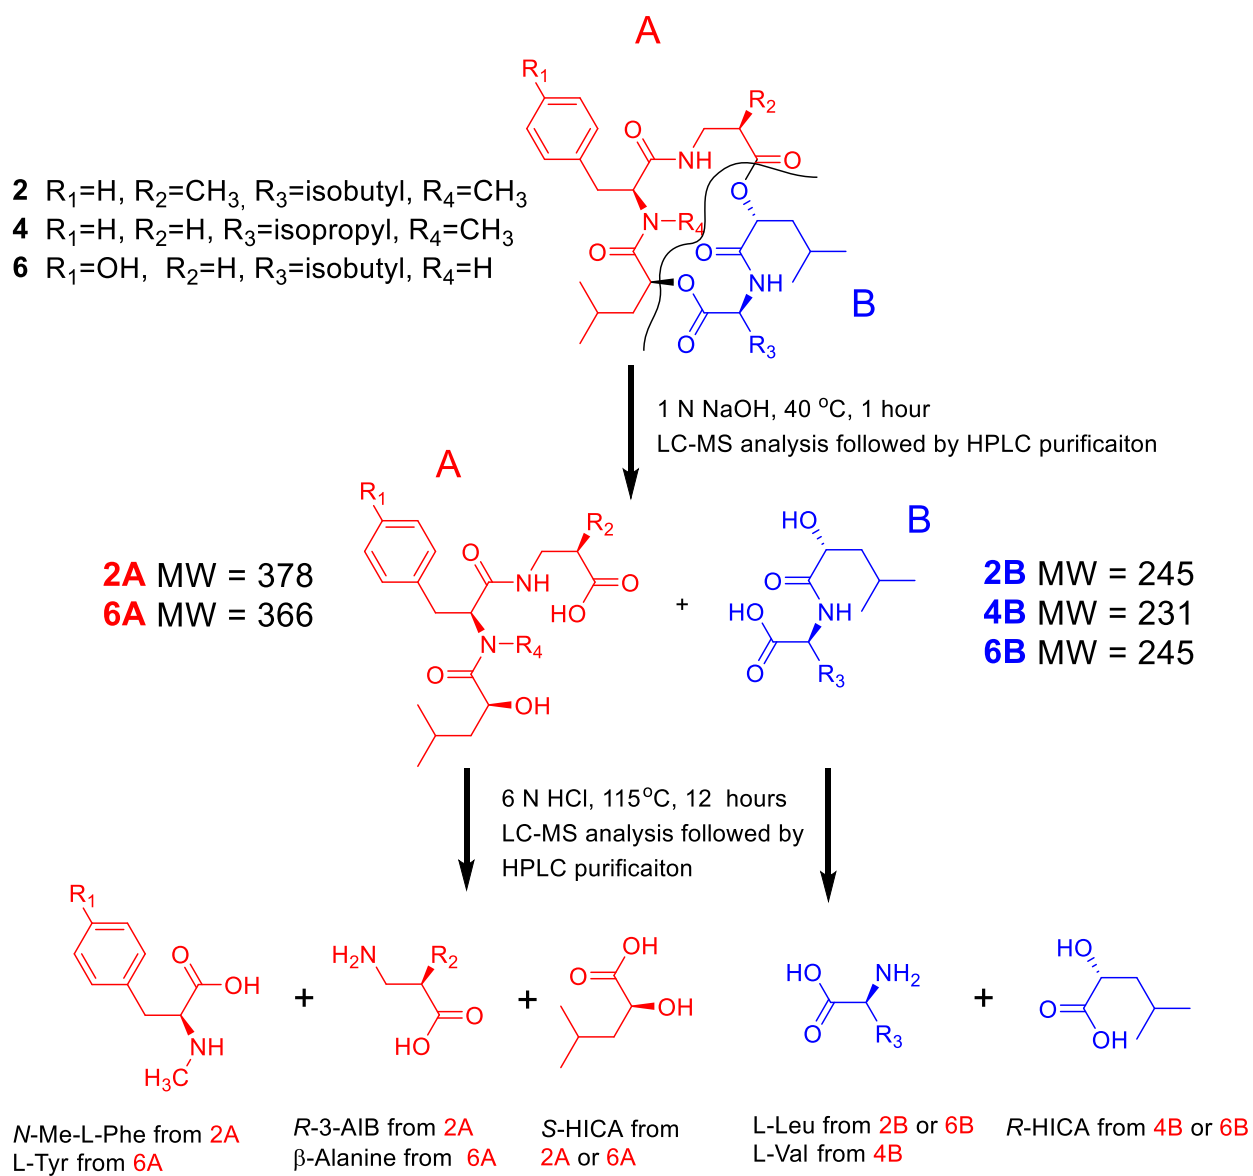

**Figure S34.** Hydrolysis and purification procedure of compounds **2**, **4**, and **6**.
